# Supplementary material for: Not immune to inequity: minority under-representation in immunotherapy trials for breast and gynecologic cancers
Source: HighWire-hosted journal article supplement (doi:10.1136/ijgc-2021-002557), 2021-06-04
Supplement: ijgc-2021-002557supp002_data_supplement.pdf [file ijgc-2021-002557supp002_data_supplement.pdf]

Table 5. Enrollment of Asian patients, expected vs. observed

| Site   | CDC incidence per 100,000 |                |                 |                |       | Difference     | p value |
|--------|---------------------------|----------------|-----------------|----------------|-------|----------------|---------|
|        | White Patients            | Asian Patients | Expected* Asian | Observed Asian | Asian |                |         |
| Ovary  | 10.4                      | 8.2            | 1226            | 416            |       | 3-fold lower   | <0.0001 |
| Cervix | 7.3                       | 6.0            | 166             | 17             |       | 10-fold lower  | <0.0001 |
| Uterus | 27.2                      | 20.6           | 79              | 6              |       | 13-fold lower  | <0.0001 |
| Breast | 125                       | 98             | 2455            | 997            |       | 2.5-fold lower | <0.0001 |

\*calculated based on actual enrollment of white patients, and CDC incidence by cancer site for white and Asian patients
